# Supplementary material for: Global Elimination of HCV—Why Is Poland Still So Far from the Goal?
Source: MDPI journal article supplement (doi:10.3390/v15102067), 2023-10-09
Supplement: s1 [file s1]

Table S1. The questionnaire

| Statement – knowledge assessment |                                                                                                                                            | Yes                      | No                       | I don't know             |
|----------------------------------|--------------------------------------------------------------------------------------------------------------------------------------------|--------------------------|--------------------------|--------------------------|
| K1                               | Chronic HCV can lead to serious complications such as liver cirrhosis and hepatocellular carcinoma.                                        | <input type="checkbox"/> | <input type="checkbox"/> | <input type="checkbox"/> |
| K2                               | Due to the asymptomatic course of infection HCV or non-typical symptoms only 1 in 5 persons is aware of infection                          | <input type="checkbox"/> | <input type="checkbox"/> | <input type="checkbox"/> |
| K3                               | Symptoms and results of chronic HCV can affect not only the liver but also other organs such as: heart, kidneys, skin, brain and pancreas. | <input type="checkbox"/> | <input type="checkbox"/> | <input type="checkbox"/> |
| K4                               | Alcohol consumption by HCV infected persons can speed up the process of liver damage.                                                      | <input type="checkbox"/> | <input type="checkbox"/> | <input type="checkbox"/> |
| K5                               | HCV vaccination can be used to prevent new infections with the virus.                                                                      | <input type="checkbox"/> | <input type="checkbox"/> | <input type="checkbox"/> |
| K6                               | Persons with HCV can safely share their toothbrushes and shaving razors with other persons.                                                | <input type="checkbox"/> | <input type="checkbox"/> | <input type="checkbox"/> |
| K7                               | HCV can be transmitted during sexual encounters.                                                                                           | <input type="checkbox"/> | <input type="checkbox"/> | <input type="checkbox"/> |
| K8                               | Using new, never before used needles, syringes and other items decreases the risk of HCV infection.                                        | <input type="checkbox"/> | <input type="checkbox"/> | <input type="checkbox"/> |
| K9                               | Children of mothers with HCV can be infected during labour.                                                                                | <input type="checkbox"/> | <input type="checkbox"/> | <input type="checkbox"/> |
| K10                              | HCV can be transmitted through the use of common kitchen utensils (e.g. cups, plates, cutlery, etc.).                                      | <input type="checkbox"/> | <input type="checkbox"/> | <input type="checkbox"/> |
| K11                              | HCV can be transmitted through coughing, sneezing, handshakes and hugging.                                                                 | <input type="checkbox"/> | <input type="checkbox"/> | <input type="checkbox"/> |
| K12                              | Effective HCV antiviral treatment can lead to a complete eradication of the virus in nearly 100% of patients.                              | <input type="checkbox"/> | <input type="checkbox"/> | <input type="checkbox"/> |
| K13                              | Persons with a history of successful HCV antiviral treatment and virus eradication cannot become reinfected with the virus.                | <input type="checkbox"/> | <input type="checkbox"/> | <input type="checkbox"/> |

K - knowledge

| Question – risk factor assessment |                                                                                                                                                                              | Yes                      | No                       | I don't know/Not applicable |
|-----------------------------------|------------------------------------------------------------------------------------------------------------------------------------------------------------------------------|--------------------------|--------------------------|-----------------------------|
| R14                               | Have you ever had a blood or blood product transfusion?                                                                                                                      | <input type="checkbox"/> | <input type="checkbox"/> | <input type="checkbox"/>    |
| R15                               | Have you ever undergone a medical procedure which included the breaking of tissue continuity (surgical procedures, blood drawing, dental procedures, endoscopic procedures)? | <input type="checkbox"/> | <input type="checkbox"/> | <input type="checkbox"/>    |
| R16                               | Have you ever undergone cosmetic procedures which included sharp implements, aesthetic medicine procedures such as piercings, tattoos, etc.?                                 | <input type="checkbox"/> | <input type="checkbox"/> | <input type="checkbox"/>    |
| R17                               | Are you undergoing long-term dialysis?                                                                                                                                       | <input type="checkbox"/> | <input type="checkbox"/> | <input type="checkbox"/>    |

|            |                                                                                                                                    |                          |                          |                          |
|------------|------------------------------------------------------------------------------------------------------------------------------------|--------------------------|--------------------------|--------------------------|
| <b>R18</b> | Are you suffering from haemophilia?                                                                                                | <input type="checkbox"/> | <input type="checkbox"/> | <input type="checkbox"/> |
| <b>R19</b> | Have you ever been hospitalized?                                                                                                   | <input type="checkbox"/> | <input type="checkbox"/> | <input type="checkbox"/> |
| <b>R20</b> | Is your work related to occupational exposure to blood product pathogens?                                                          | <input type="checkbox"/> | <input type="checkbox"/> | <input type="checkbox"/> |
| <b>R21</b> | Have you ever been exposed to blood product pathogens at work?                                                                     | <input type="checkbox"/> | <input type="checkbox"/> | <input type="checkbox"/> |
| <b>R22</b> | Have you been diagnosed with HBV and/or HCV during pregnancy?                                                                      | <input type="checkbox"/> | <input type="checkbox"/> | <input type="checkbox"/> |
| <b>R23</b> | Have you ever shared personal cosmetic-hygenic utensils with other persons (e.g. shaving razors or other sharp cosmetic utensils)? | <input type="checkbox"/> | <input type="checkbox"/> | <input type="checkbox"/> |
| <b>R24</b> | Have you ever injected or inhaled drugs?                                                                                           | <input type="checkbox"/> | <input type="checkbox"/> | <input type="checkbox"/> |
| <b>R25</b> | Have you ever had a random sexual encounter with no protection?                                                                    | <input type="checkbox"/> | <input type="checkbox"/> | <input type="checkbox"/> |
| <b>R26</b> | Have you been diagnosed with HIV?                                                                                                  | <input type="checkbox"/> | <input type="checkbox"/> | <input type="checkbox"/> |
| <b>R27</b> | Have you ever performed a blood test for HCV?                                                                                      | <input type="checkbox"/> | <input type="checkbox"/> | <input type="checkbox"/> |

R – risk factor

### Personal Information:

#### 1. Gender

☐ Female ☐ Male

#### 2. Age:

 

#### 3. Place of residence

- ☐ Village
- ☐ City under 50,000 inhabitants ☐ City between 51,000 and 200,000 inhabitants
- ☐ City between 201,000 and 500,000 inhabitants
- ☐ City above 500,000 inhabitants

#### 4. Education

- ☐ Primary/Vocational ☐ High School graduate
- ☐ Higher education
- ☐ Other

## 5. How do you assess your knowledge on HCV:

*1 - no knowledge*

|\_\_1\_\_|\_\_2\_\_|\_\_3\_\_|\_\_4\_\_|\_\_5\_\_|\_\_6\_\_|\_\_7\_\_|\_\_8\_\_|\_\_9\_\_|\_\_10\_\_|

*10-very high level of knowledge*

Table S2. The total number of unmodifiable risk factors

|   | The total number of unmodifiable risk factors |       |
|---|-----------------------------------------------|-------|
|   | N                                             | %     |
| 0 | 130                                           | 9.98  |
| 1 | 218                                           | 16.73 |
| 2 | 532                                           | 40.83 |
| 3 | 268                                           | 20.57 |
| 4 | 135                                           | 10.36 |
| 5 | 20                                            | 1.53  |

Table S3 The total number of modifiable risk factors

|   | The total number of modifiable risk factors |       |
|---|---------------------------------------------|-------|
|   | N                                           | %     |
| 0 | 706                                         | 54.18 |
| 1 | 433                                         | 33.23 |
| 2 | 130                                         | 9.98  |
| 3 | 29                                          | 2.23  |
| 4 | 5                                           | 0.38  |
